# Supplementary material for: On the stability of anion exchange membrane fuel cells incorporating polyimidazolium ionene (Aemion+®) membranes and ionomers
Source: Royal Society of Chemistry journal article supplement (doi:10.1039/d2se00690a), 2022-01-01
Supplement: d2se00690a1.pdf [file d2se00690a1.pdf]

## **Supporting Information: On the stability of anion exchange membrane fuel cells incorporating polyimidazolium ionene (Aemion+<sup>®</sup>) membranes and ionomers**

Qiliang Wei,<sup>a</sup> Xinzhi Cao,<sup>a</sup> Philipp Veh,<sup>b</sup> Anastasiia Konovalova,<sup>a</sup> Peter Mardle,<sup>a</sup> Philip Overton,<sup>a</sup> Simon Cassegrain,<sup>a</sup> Severin Vierrath,<sup>b,c</sup> Matthias Breitwieser,<sup>b</sup> and Steven Holdcroft.<sup>a</sup>

<sup>a</sup> Holdcroft Research Group, Department of Chemistry, Simon Fraser University, 8888 University Drive, Burnaby BC V5A 1S6, Canada

<sup>b</sup> Electrochemical Energy Systems, IMTEK, Department of Microsystems Engineering, University of Freiburg, Georges-Koehler-Allee 103, 79110 Freiburg, Germany

<sup>c</sup> Freiburg Center for Interactive Materials and Bioinspired Technologies, FIT, University of Freiburg, Georges-Köhler-Allee 105, 79110 Freiburg, Germany

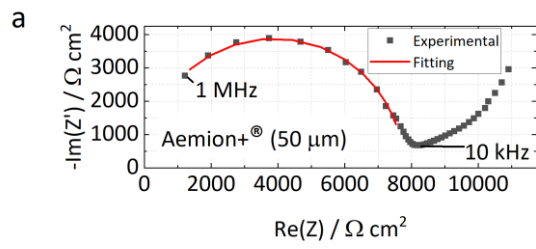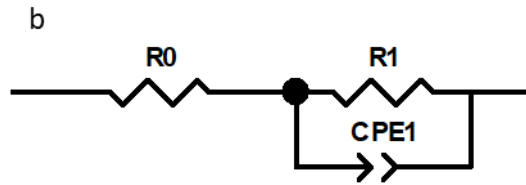

**Figure S1: (a)** Example of fitting the EIS spectra for ex-situ conductivity measurements. Fitting was conducted with the equivalent circuit **(b)**. R1 is taken as the resistance for ionic conduction within the AEM.

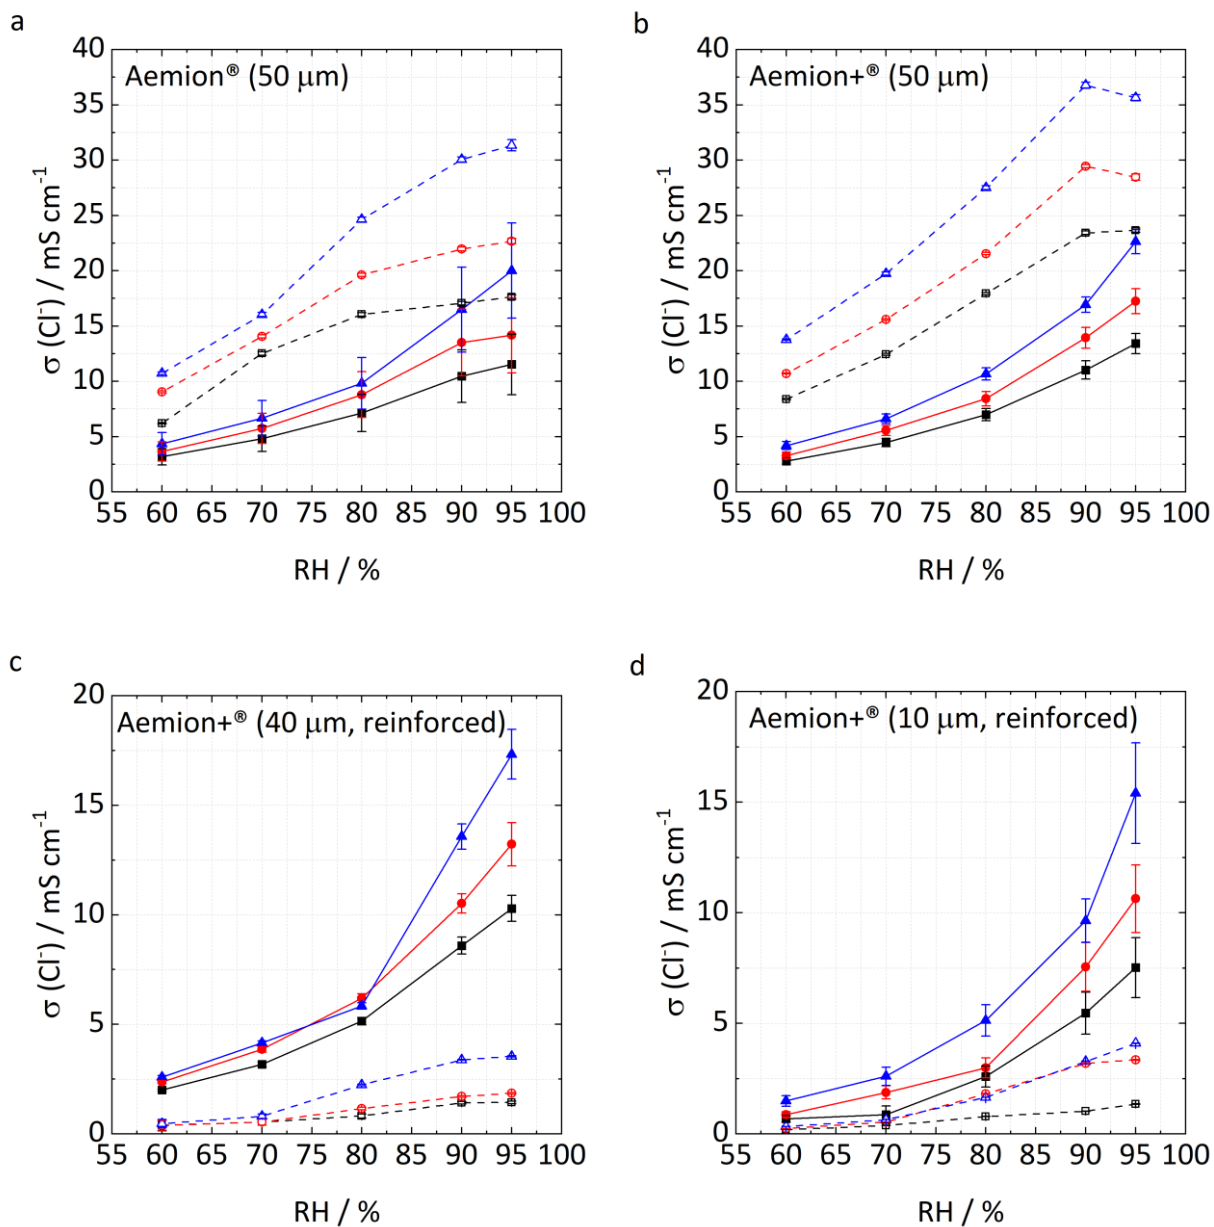

**Figure S2:** In-plane (solid) and through-plane (dashed) Cl<sup>-</sup> conductivity for all AEMs tested at 60 (black), 70 (red) and 80 (blue) °C.

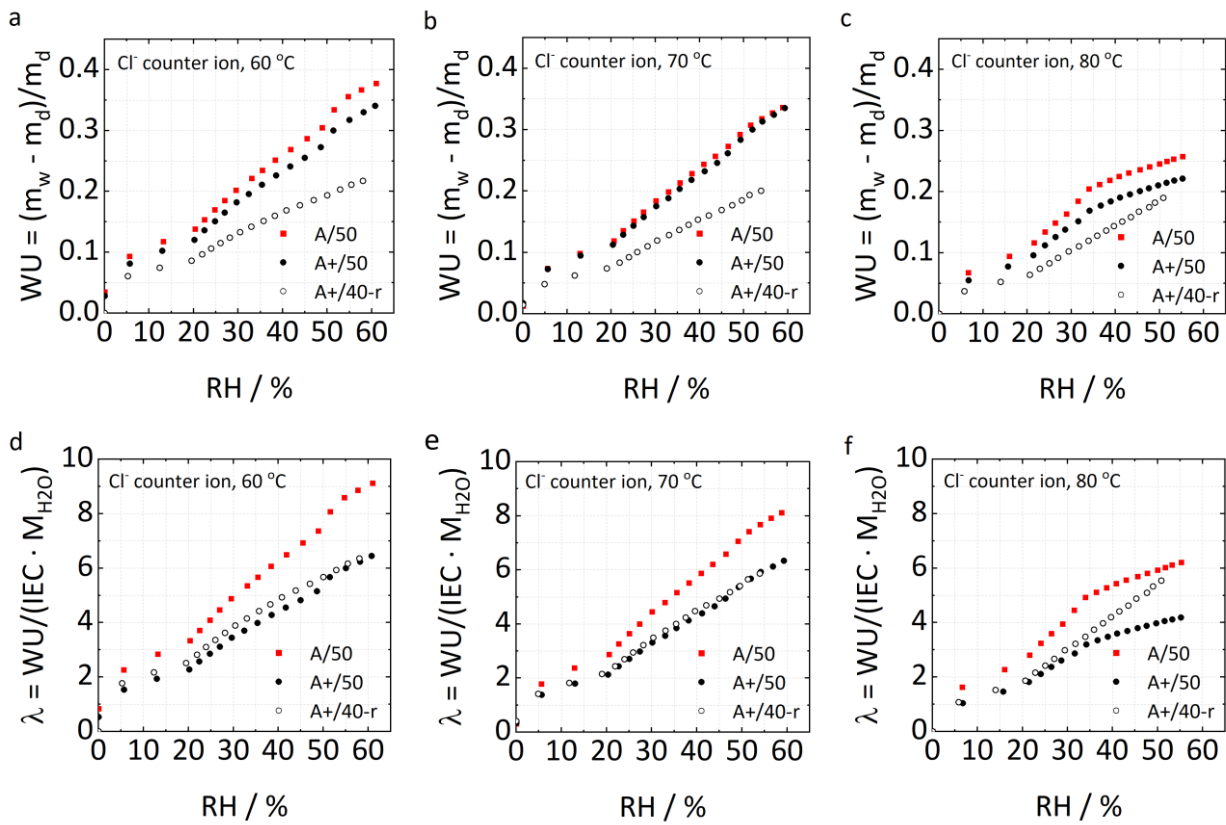

**Figure S3:** DVS for all three temperatures and AEMs investigated in the AEMFC study. Thicker variants were used for direct comparison with the ex-situ conductivity measurements. All isotherms were acquired in the desorption direction (high RH to low). Materials characterized are: ■ Aemion<sup>®</sup>, 50  $\mu\text{m}$  (A/50) ● Aemion+<sup>®</sup>, 50  $\mu\text{m}$  (A+/50) ○ Aemion+<sup>®</sup>, 40  $\mu\text{m}$ , reinforced (A+/40-r).

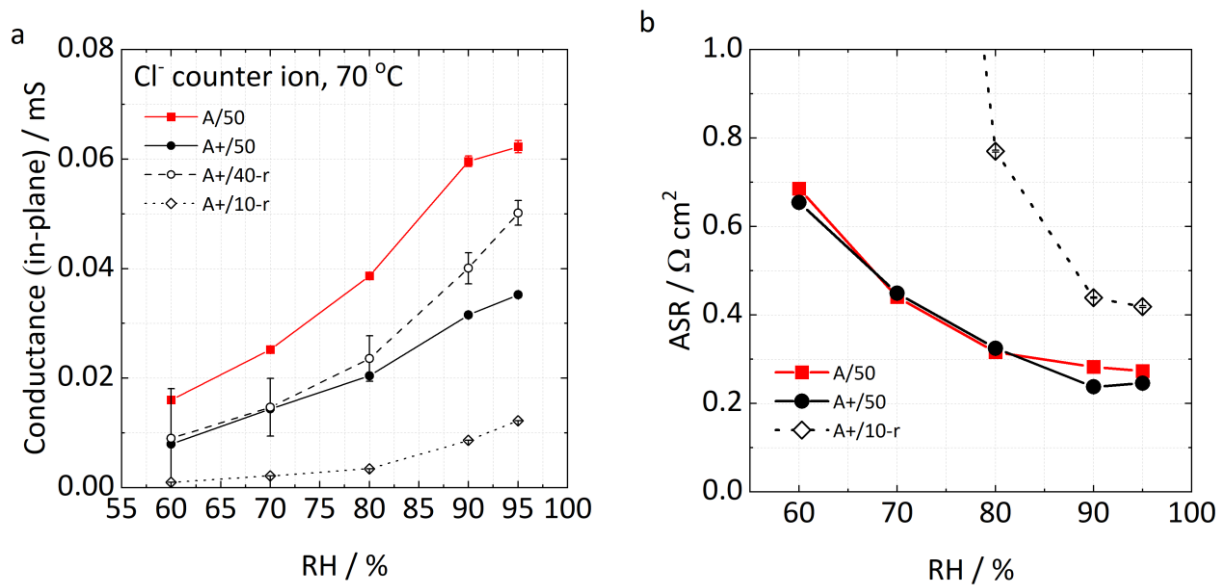

**Figure S4:** (a) In-plane conductance for AEMs in their  $\text{Cl}^-$  form at 70  $^{\circ}\text{C}$  and (b) through-plane area specific resistance focused on the monolithic AEMs. Materials characterized are: ■ Aemion<sup>®</sup>, 50  $\mu\text{m}$

(A/50) ● Aemion<sup>®</sup>, 50 μm (A+/50) ○ Aemion<sup>®</sup>, 40 μm, reinforced (A+/40-r) and ◇ Aemion<sup>®</sup>, 10 μm, reinforced (A+/10-r).

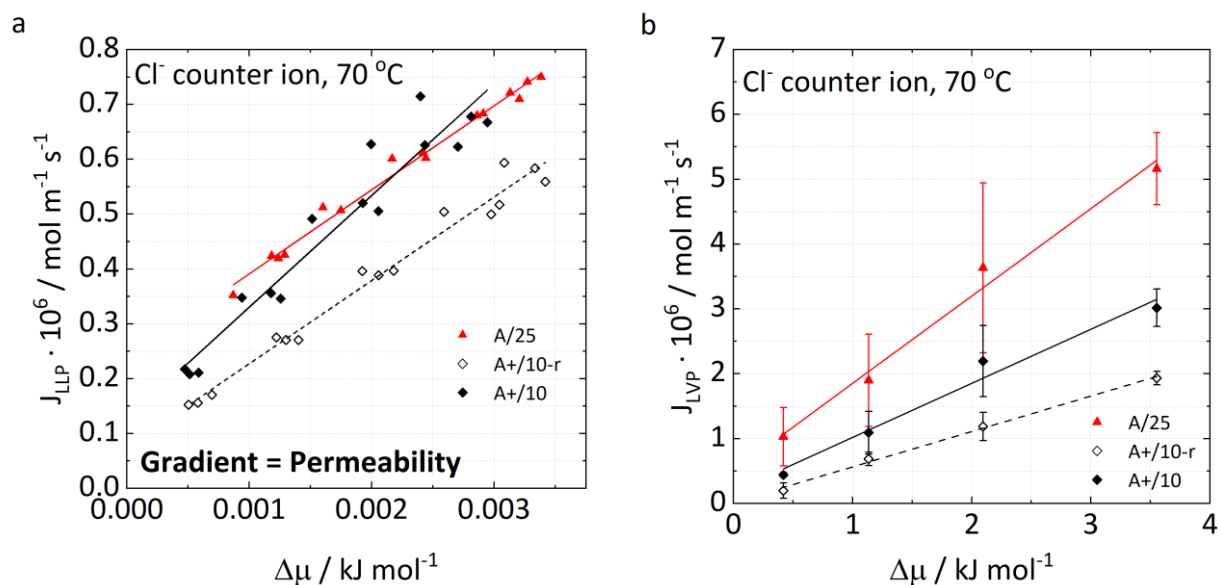

**Figure S5: (a)** LLP and **(b)** LVP where the water flux on the y-axis is normalized for the wet thickness of the AEM. The slope therefore corresponds to the permeability. Materials characterized are: ▲ Aemion<sup>®</sup>, 25 μm (A/25) ◆ Aemion<sup>®</sup>, 10 μm (A+/10) and ◇ Aemion<sup>®</sup>, 10 μm, reinforced (A+/10-r).

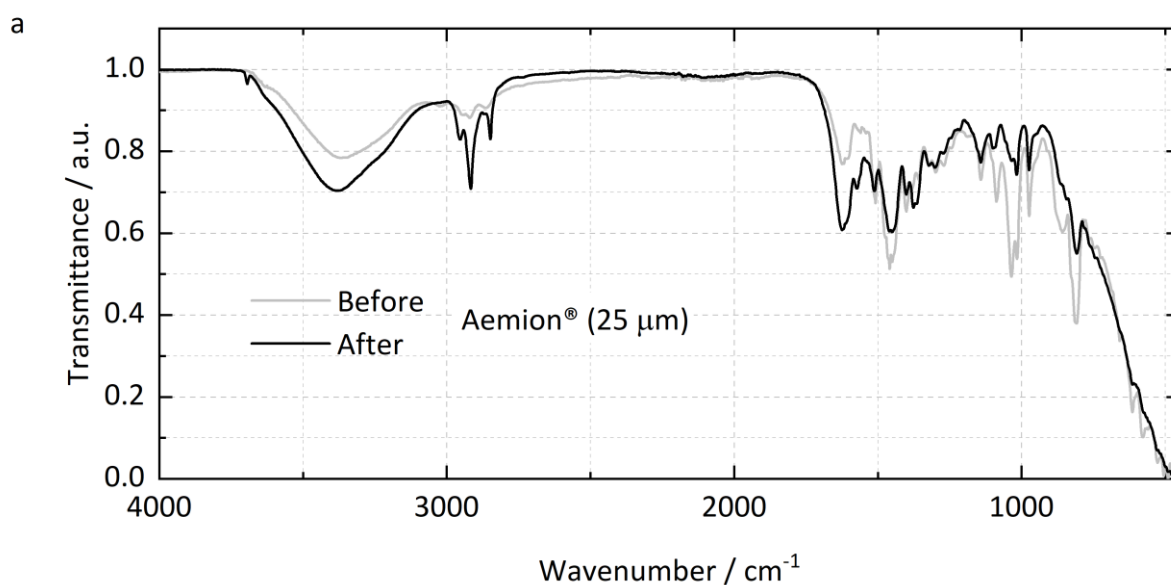

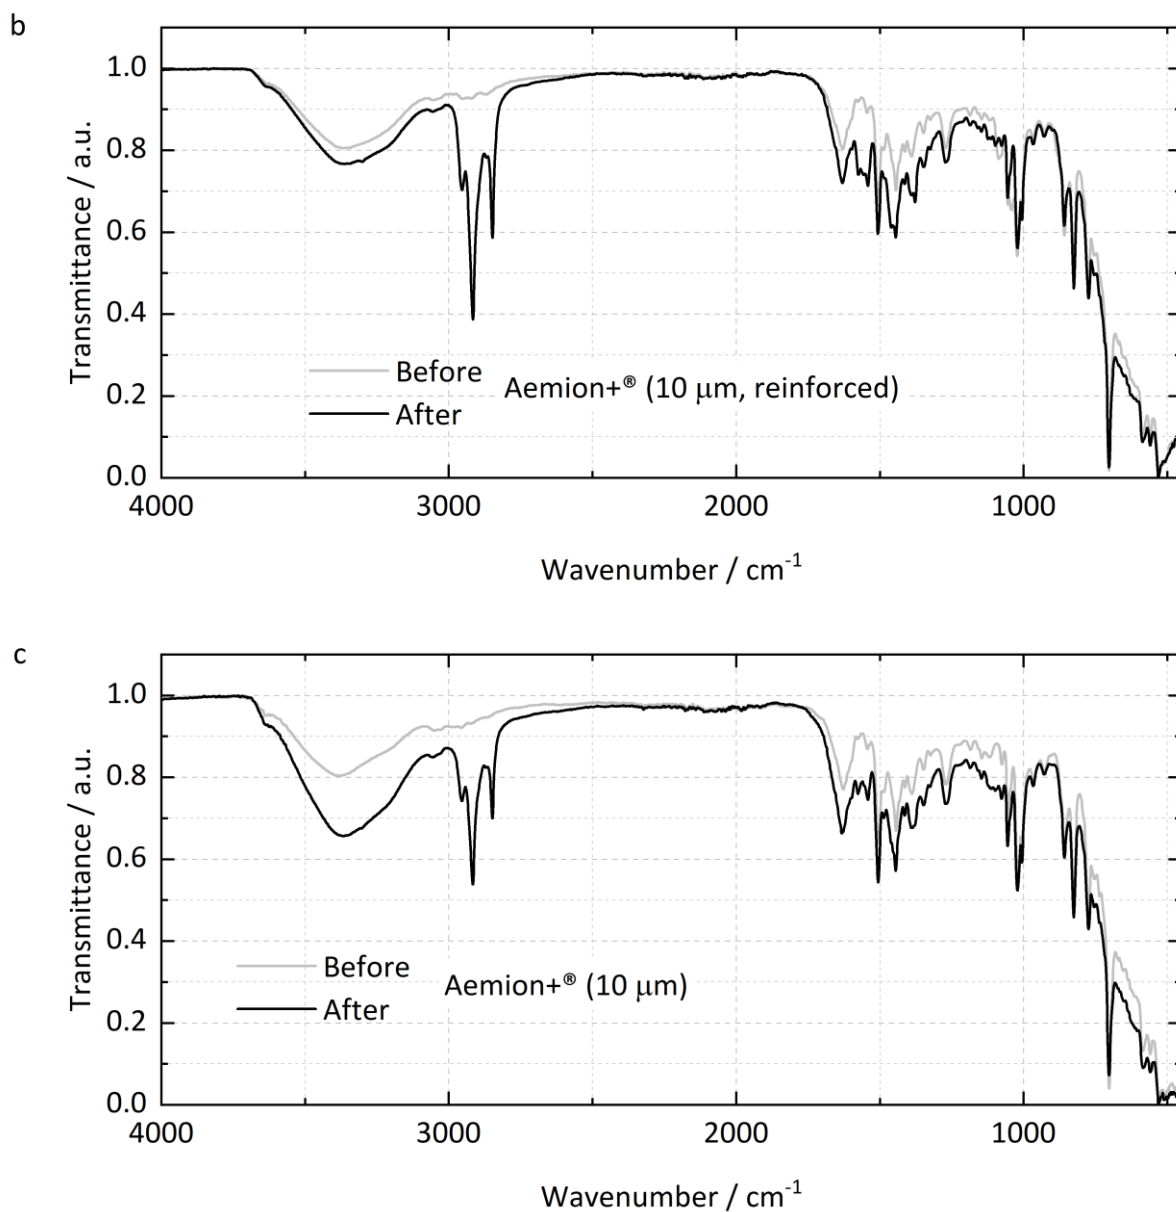

**Figure S6:** ATR-FTIR of AEMs in their Cl<sup>-</sup> form. Before (pristine) and after degradation by submerging in 3 M KOH<sub>(aq)</sub> for 7 days at 80 °C. **(a)** Aemion<sup>®</sup>, 25 μm, **(b)** Reinforced Aemion<sup>®</sup>, 10 μm, **(c)** Aemion<sup>®</sup>, 10 μm. Transmittance is normalized between 1-0.

|                                                   | Tensile Strength /<br>MPa | Elongation at break<br>/ % | Young's Modulus /<br>MPa |
|---------------------------------------------------|---------------------------|----------------------------|--------------------------|
| <b>Aemion<sup>®</sup> (10 μm)</b>                 | 28 ± 4                    | 40 ± 14                    | 443 ± 58                 |
| <b>Aemion<sup>®</sup> (10 μm,<br/>reinforced)</b> | 29 ± 10                   | 61 ± 24                    | 403 ± 132                |

**Table S1:** Mechanical strength tests of AEMs in their Cl<sup>-</sup> form, atmospheric conditions after degradation in 3M KOH<sub>(aq)</sub> for 7 days at 80 °C. Aemion<sup>®</sup> was too brittle after the degradation test to be measured.

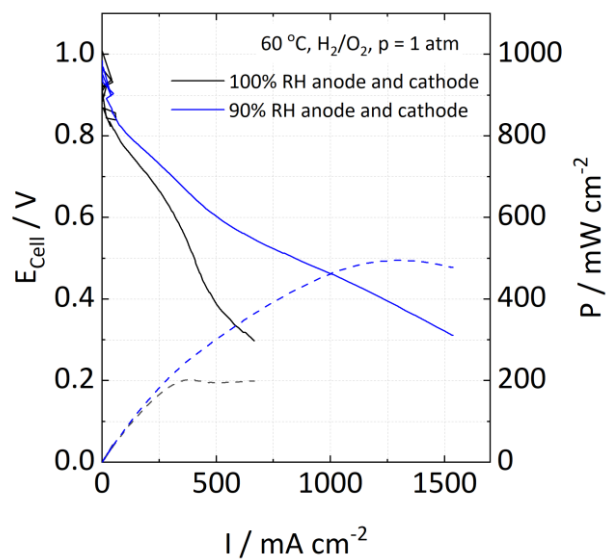

**Figure S7.** Polarization curves and power density curves of single cells between OCP and 0.3 V using TKK Pt/C as cathode and PtRu/C as anode with a Pt loading of  $0.5 \text{ mg}_{\text{Pt}} \text{ cm}^{-2}$  on both cathode and anode. The  $\text{H}_2$  and  $\text{O}_2$  flows are set to 0.5 slpm. The cell temperature was  $60 \text{ }^\circ\text{C}$ . The effect of anode and cathode RH on an MEA with Aemion+<sup>®</sup> ( $10 \text{ }\mu\text{m}$ , reinforced) is shown.

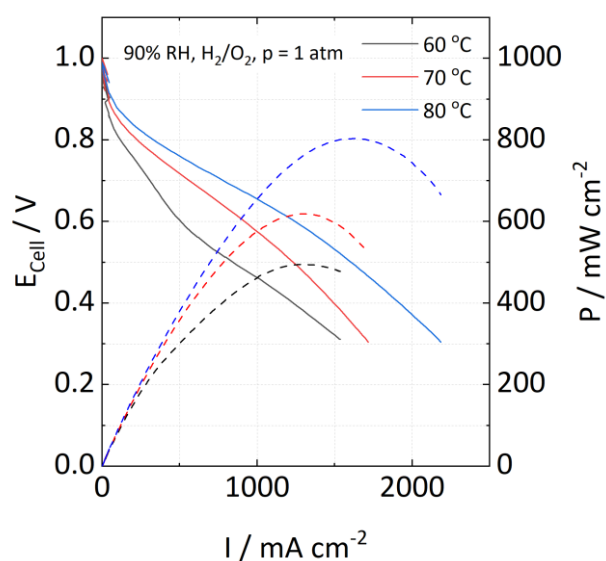

**Figure S8.** Polarization curves and power density curves of single cells between OCP and 0.3 V using TKK Pt/C as cathode and PtRu/C as anode with a Pt loading of  $0.5 \text{ mg}_{\text{Pt}} \text{ cm}^{-2}$  on both cathode and anode. The  $\text{H}_2$  and  $\text{O}_2$  flows are set to 0.5 slpm. The RH at the anode and cathode was 90%. The effect of cell temperature on an MEA with Aemion+<sup>®</sup> ( $10 \text{ }\mu\text{m}$ , reinforced) is shown.

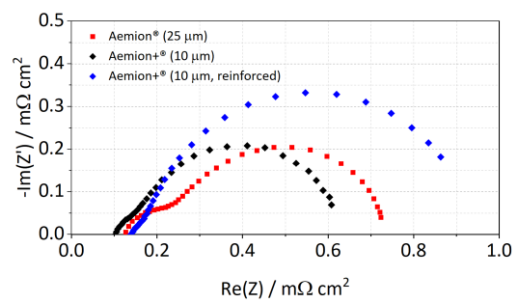

**Figure S9:** EIS in the frequency range 10 kHz – 0.1 Hz at 0.8 V with amplitude 10 mV. AEMFC conditions are the same as in **Figure 2a**.



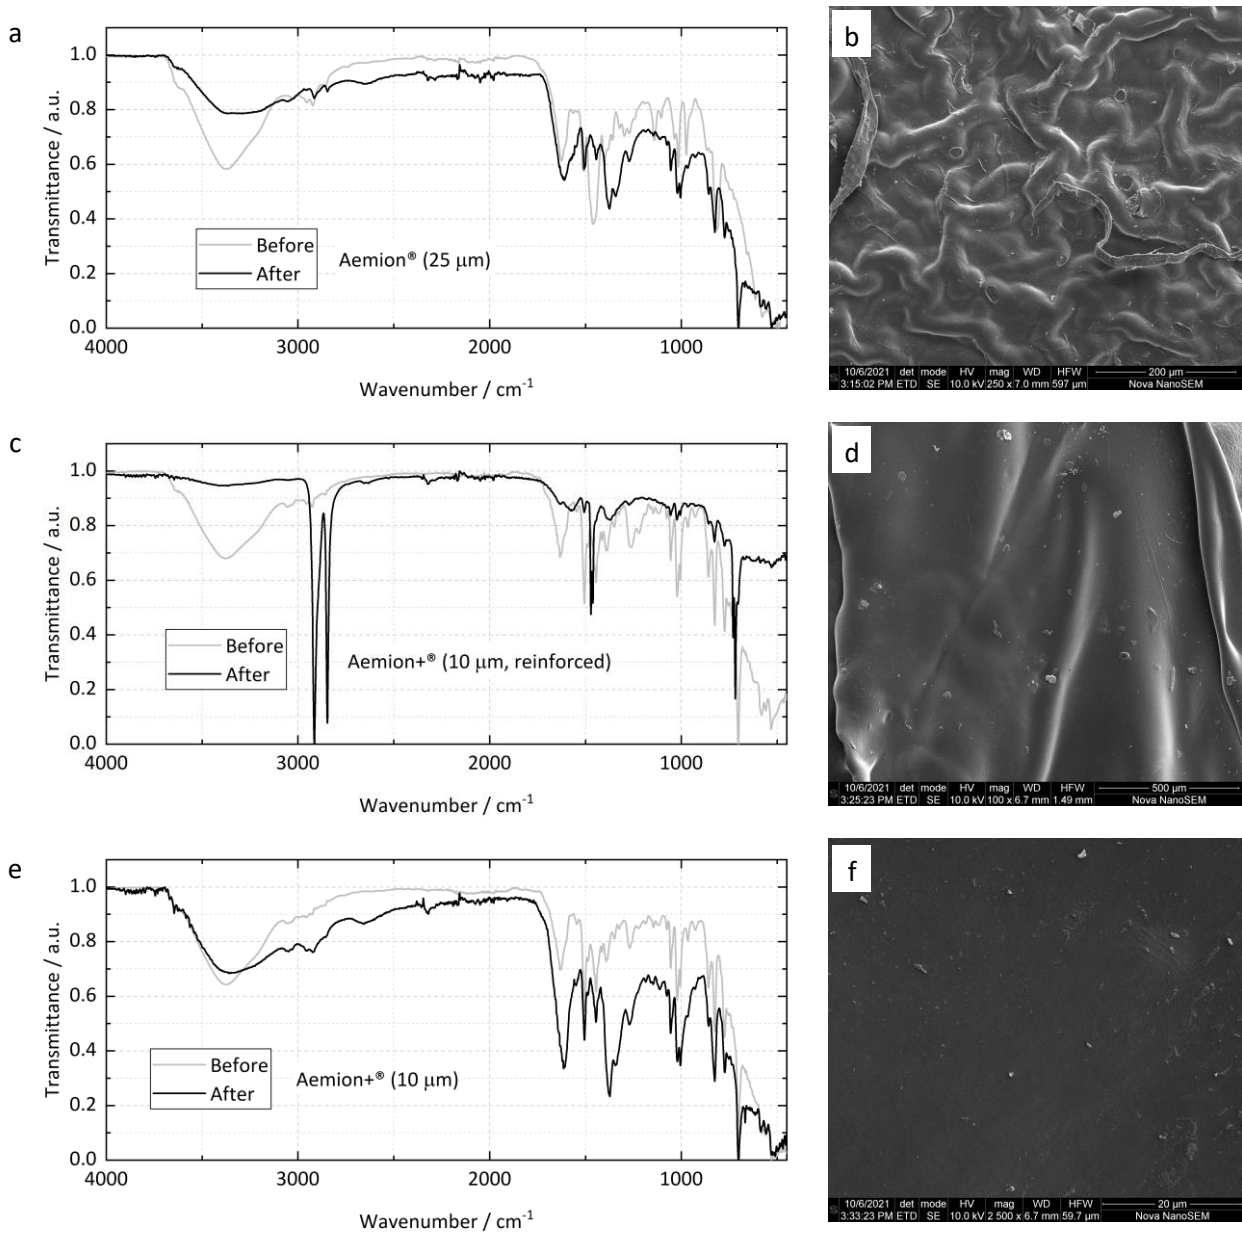

**Figure S10:** ATR-FTIR spectrums and matching active area surface SEM images of membranes after AEMFC test: **(a)-(b)** Aemion® (25  $\mu\text{m}$ ); **(c)-(d)** Aemion+® (10  $\mu\text{m}$ ); **(e)-(f)** Aemion+® (10  $\mu\text{m}$ , reinforced). Transmittance is normalized between 1-0.

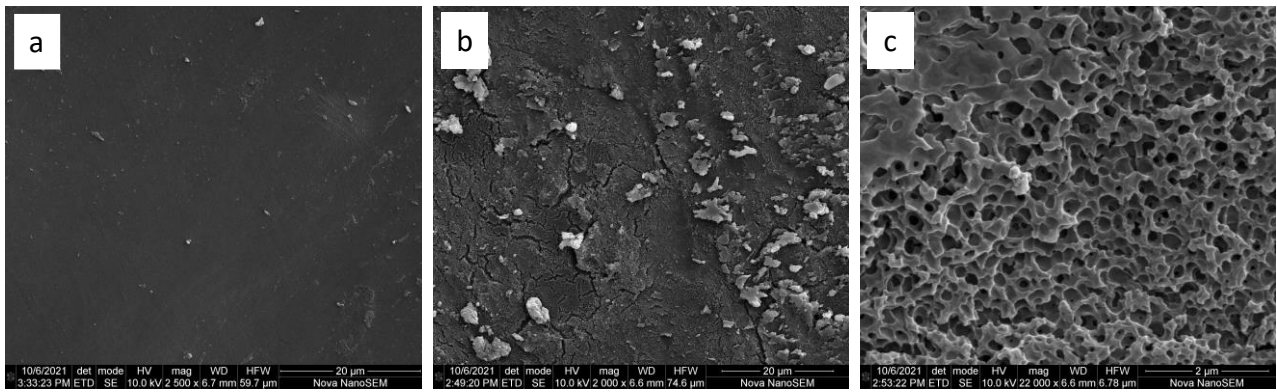

**Figure S11:** Active area surface SEM images of the reinforced Aemion<sup>®</sup>+ membrane: **(a)** Anode side; **(b)** Cathode side; **(c)** Side B magnification.

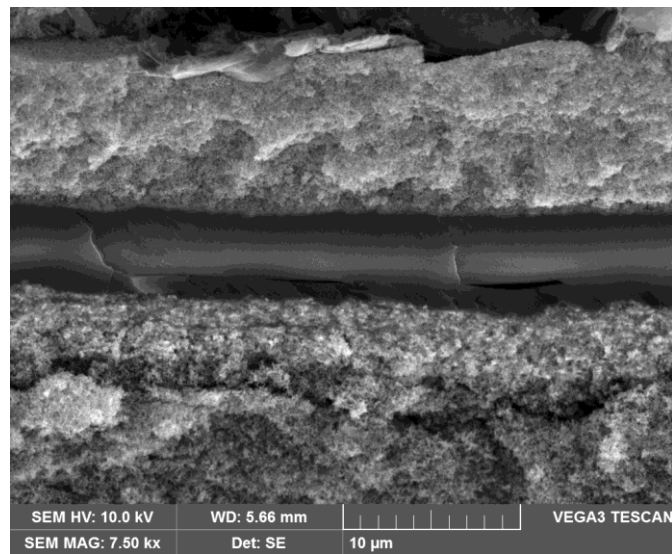

**Figure S12:** SEM image of the MEA cross-section of the DMD-based AEM fuel cell, showing the thin total membrane thickness of only 5  $\mu\text{m}$ .

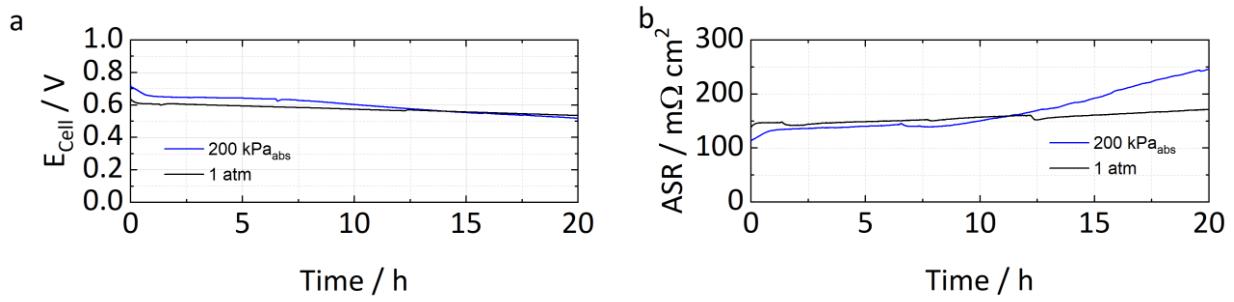

**Figure S13: (a)** Voltage decay and, **(b)** ASR increase of single cells with TKK Pt/C as cathode and PtRu/C as anode with a Pt loading of  $0.5 \text{ mg}_{\text{Pt}} \text{ cm}^{-2}$  on both cathode and anode. The  $\text{H}_2$  and  $\text{O}_2$  flows are set to 0.5 slpm. The RH at the anode and cathode was 90%. The cell temperature was  $70^\circ \text{C}$  and the current density was  $600 \text{ mA cm}^{-2}$ . Aemion+® (10  $\mu\text{m}$ , reinforced) was used as the AEM.
